# Supplementary material for: Defect Density-Dependent pH Response of Graphene Derivatives: Towards the Development of pH-Sensitive Graphene Oxide Devices
Source: MDPI journal article supplement (doi:10.3390/nano12111801), 2022-05-25
Supplement: s1 [file s1]

# Defect density dependent pH response of graphene derivatives: towards the development of pH-sensitive graphene oxide devices

Shayan Angizi<sup>1</sup>, Xianxuan Huang<sup>1</sup>, Lea Hong<sup>1</sup>, Md Ali Akbar<sup>1</sup>, P. Ravi Selvaganapathy<sup>2</sup>, Peter Kruse<sup>1</sup>, \*

<sup>1</sup> Department of Chemistry and Chemical Biology, McMaster University, 1280 Main Street West, Hamilton, Ontario L8S 4M1, Canada; angizis@mcmaster.ca

<sup>2</sup> Department of Mechanical Engineering, McMaster University, 1280 Main Street West, Hamilton, Ontario L8S 4L7, Canada.

Correspondence: [pkruise@mcmaster.ca](mailto:pkruise@mcmaster.ca).

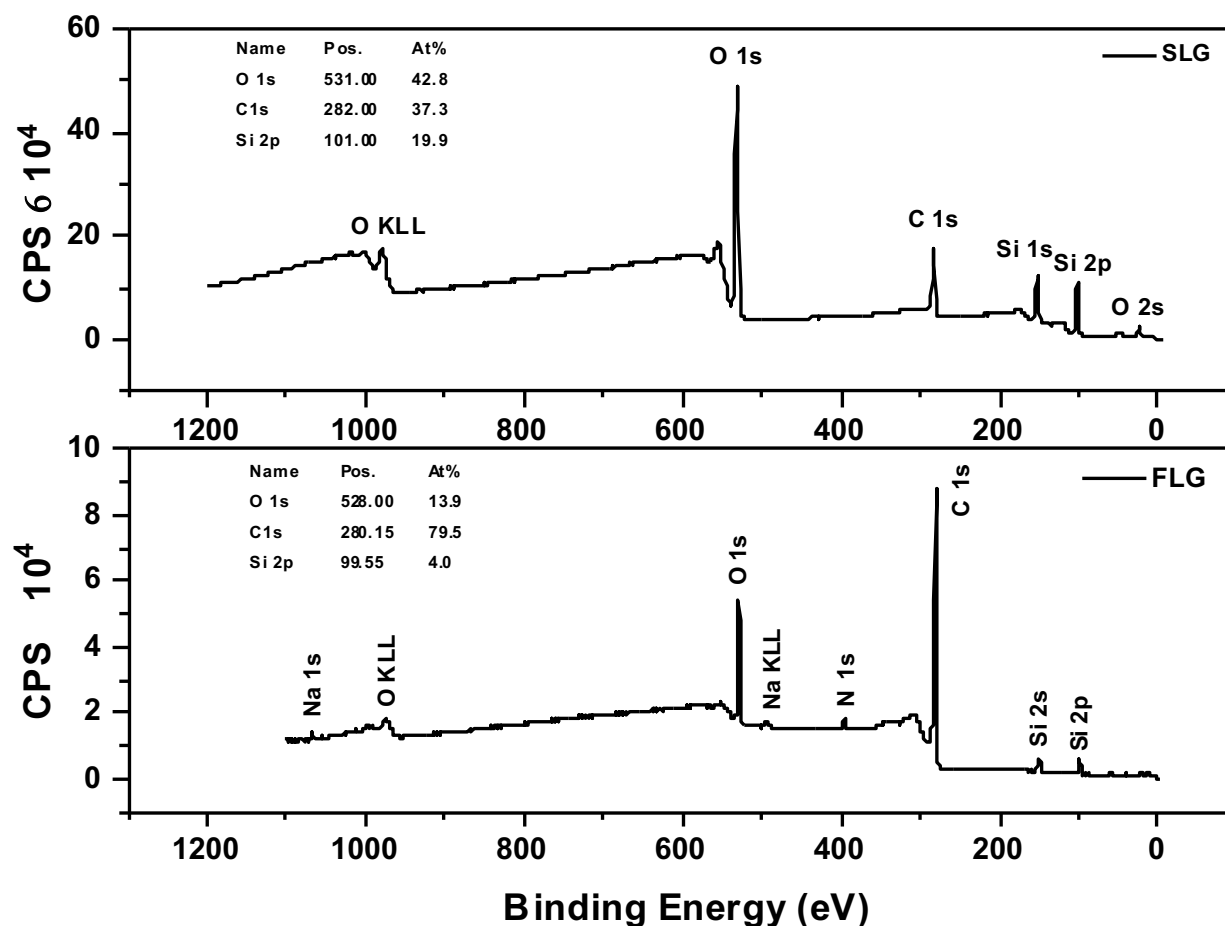

Figure S1. XPS survey spectra of a) SLG, b) FLG

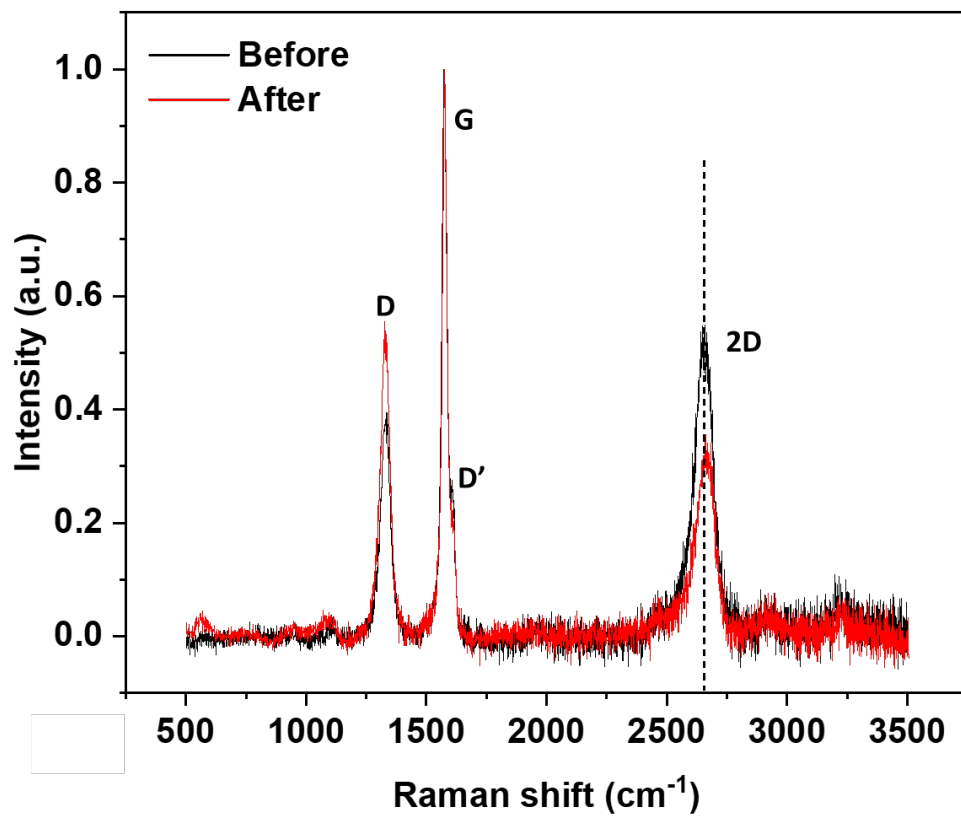

**Figure S2.** Raman spectra of FLG before and after exposure to pH

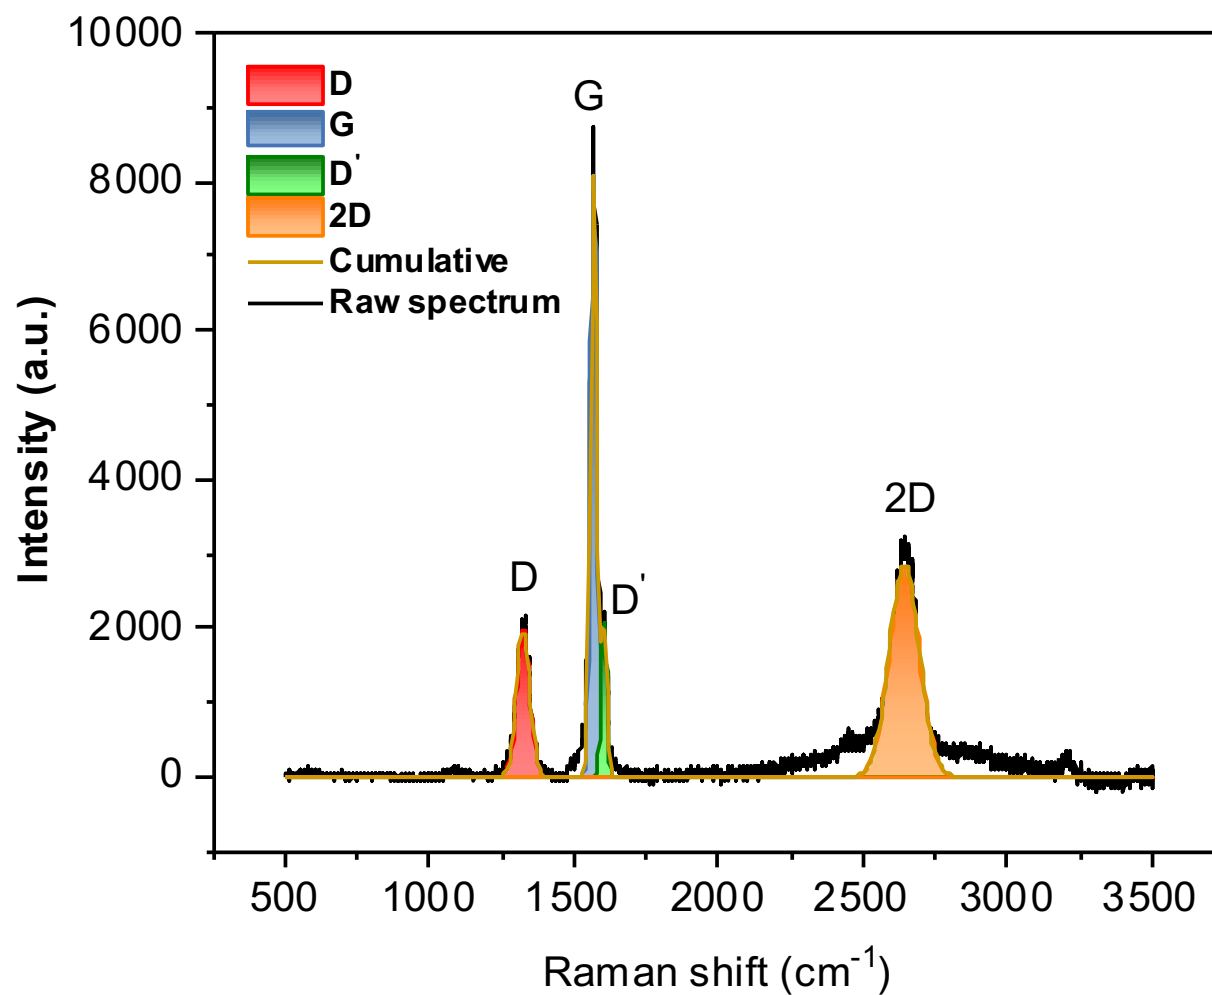

**Figure S3.** Raman spectrum of 8h annealed FLG

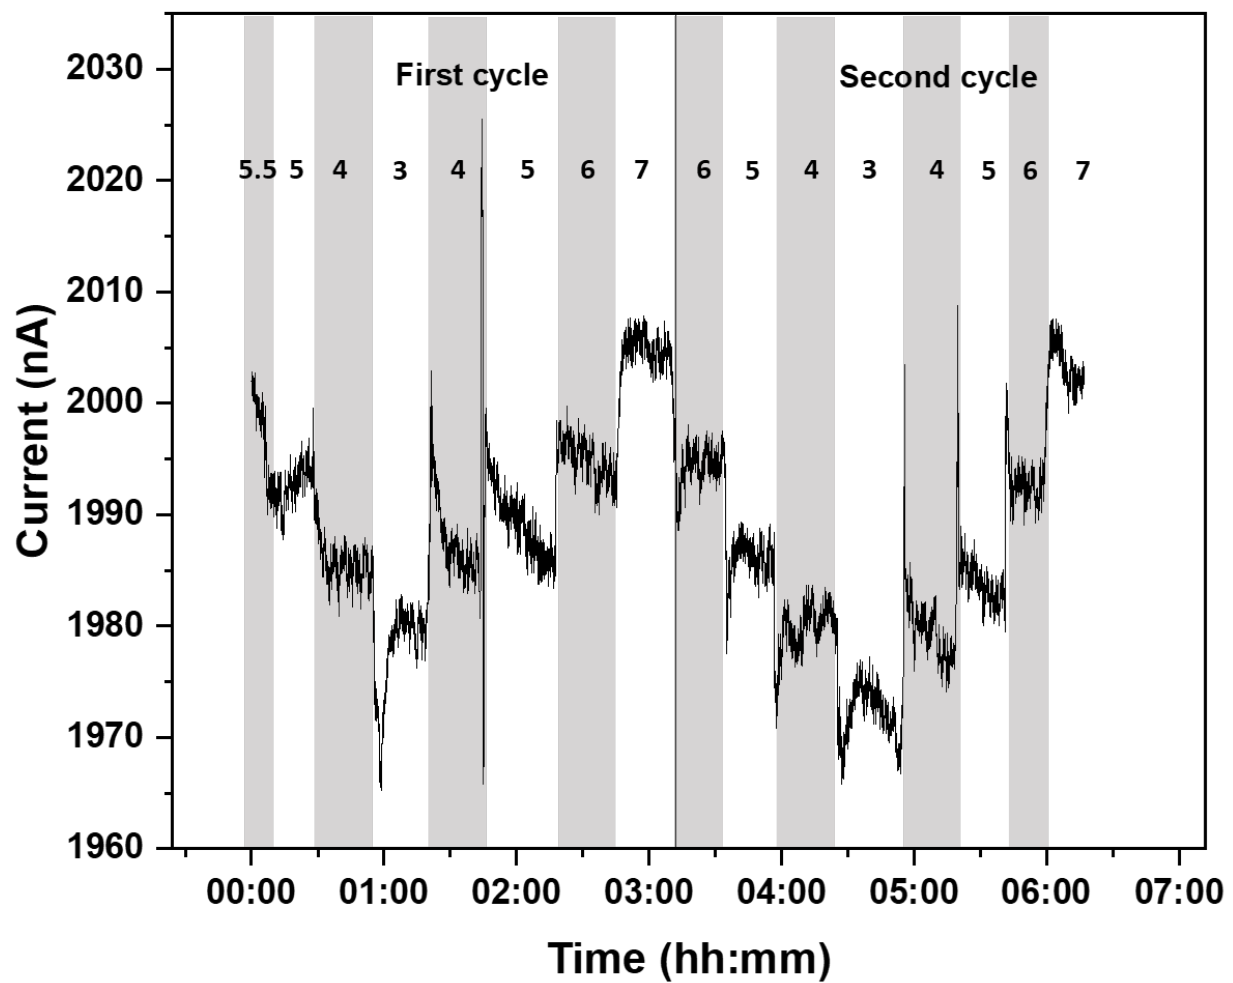

**Figure S4.** pH response of 8h annealed FLG

**Table S1.** Summary of information on Pyrene concentrations and their corresponding relative surface coverage obtained from literature [1–3]

|                    | Pyrene derivatives<br>concentration (mM) | Relative Surface coverage (%) | Surface density<br>(#/cm <sup>2</sup> ) |
|--------------------|------------------------------------------|-------------------------------|-----------------------------------------|
| Py-COOH            | 0.3                                      | 90                            | $4.82 \times 10^{14}$                   |
|                    | 0.15                                     | 40                            | $2.14 \times 10^{14}$                   |
|                    | 0.1                                      | 25                            | $1.34 \times 10^{14}$                   |
|                    | 0.05                                     | 10                            | $5.35 \times 10^{13}$                   |
| Py-NH <sub>2</sub> | 1.4                                      | 90                            | $4.82 \times 10^{14}$                   |
|                    | 0.7                                      | 50                            | $2.68 \times 10^{14}$                   |
|                    | 0.35                                     | 28                            | $1.05 \times 10^{14}$                   |
|                    | 0.1                                      | 10                            | $5.35 \times 10^{13}$                   |
| Py-OH              | 1.6                                      | 90                            | $4.82 \times 10^{14}$                   |
|                    | 0.8                                      | 25                            | $1.87 \times 10^{14}$                   |
|                    | 0.4                                      | 20                            | $1.07 \times 10^{14}$                   |

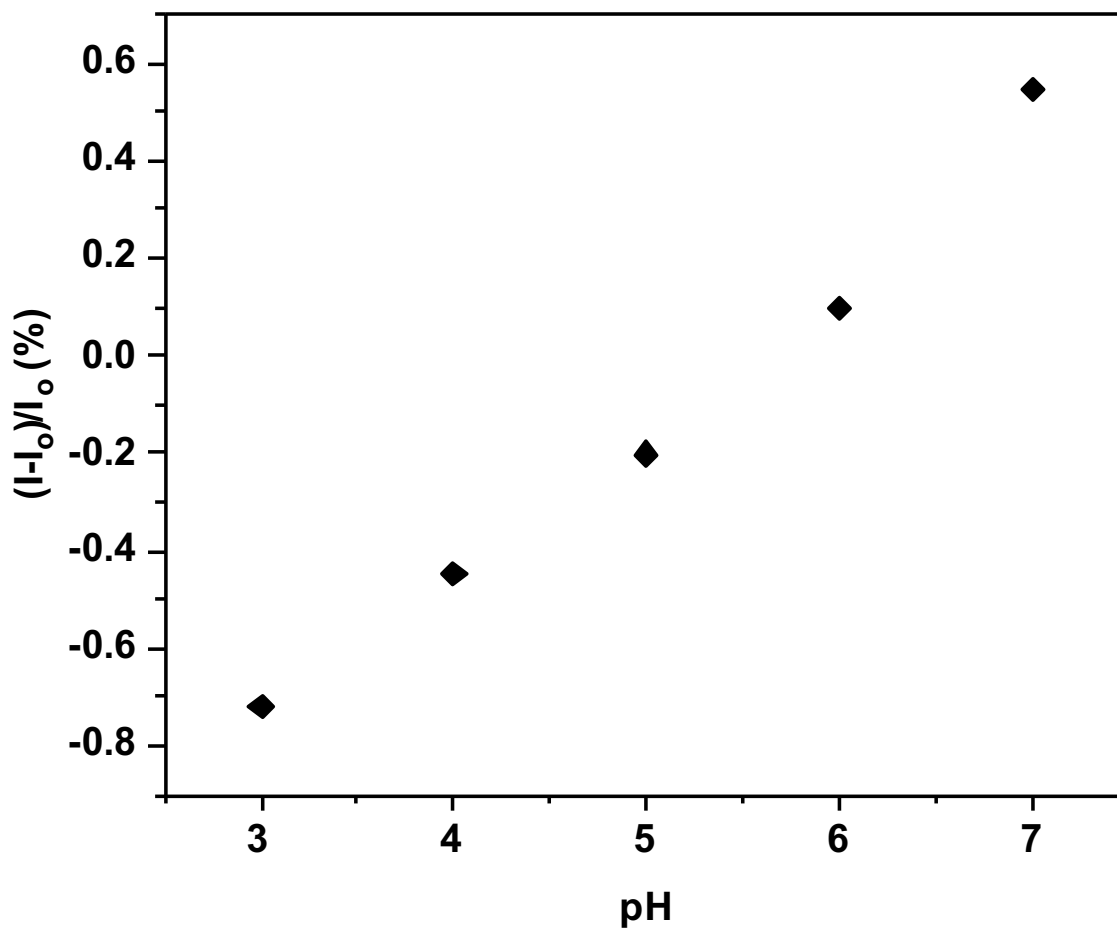

**Figure S5.** Calibration curve of the pH response of 8h annealed FLG

**Table S2.** Average  $\pm$  Standard deviation of Py-COOH functionalized sensors to pH range 3-8 (3 sensors each)

| Concentration/pH | 3                | 4                | 5               | 6                | 7                |
|------------------|------------------|------------------|-----------------|------------------|------------------|
| 0.30 mM          | 55.6 $\pm$ 1.21  | 37.2 $\pm$ 3.2   | 12.27 $\pm$ 2   | 8.09 $\pm$ 0.7   | -1.33 $\pm$ 0.9  |
| 0.15 mM          | 31.96 $\pm$ 0.84 | 21.12 $\pm$ 1.26 | 7.33 $\pm$ 0.24 | 2.68 $\pm$ 0.3   | -1.16 $\pm$ 0.01 |
| 0.10 mM          | 4.92 $\pm$ 0.4   | 1.9 $\pm$ 0.62   | 0.69 $\pm$ 0.02 | 0.02 $\pm$ 0.003 | 1.3 $\pm$ 1.1    |
| 0.05 mM          | 0.75 $\pm$ 0.089 | 0.84 $\pm$ 0.044 | 1.16 $\pm$ 0.1  | 1.04 $\pm$ 0.1   | 0.28 $\pm$ 0.64  |

**Table S3.** Average  $\pm$  Standard deviation of Maximum response of pyrene derivative functionalized sensors as a functional surface density (3 sensors each).

| -COOH           |                 | -NH <sub>2</sub> |                | -OH             |                 |
|-----------------|-----------------|------------------|----------------|-----------------|-----------------|
| Surface density | Max. response   | Surface density  | Max. response  | Surface density | Max. response   |
| 4.82E+14        | 56.1 $\pm$ 8.31 | 4.82E+14         | 3.1 $\pm$ 0.63 | 4.82E+14        | -75.1 $\pm$ 4.4 |
| 2.14E+14        | 32.4 $\pm$ 7.21 | 2.68E+14         | 2.6 $\pm$ 0.32 | 1.87E+14        | -16.2 $\pm$ 1.3 |
| 1.34E+14        | 5.1 $\pm$ 3.79  | 1.50E+14         | 6.66 $\pm$ 1.2 | 1.07E+14        | -9.21 $\pm$ 1.8 |
| 5.35E+13        | 2.05 $\pm$ 3.26 | 5.35E+13         | -4 $\pm$ 0.19  | -----           | -----           |

**Table S4.** Average  $\pm$  Standard deviation of Py-NH<sub>2</sub> functionalized sensors to pH range 3-8 (3 sensors each).

| Concentration/pH | 3                | 4                | 5                | 6               | 7                | 8               |
|------------------|------------------|------------------|------------------|-----------------|------------------|-----------------|
| 1.4 mM           | 3.1 $\pm$ 0.63   | 1.35 $\pm$ 0.21  | 0.14 $\pm$ 0.2   | 0.34 $\pm$ 0.08 | 0.04 $\pm$ 0.008 | 0.24 $\pm$ 0.1  |
| 0.7 mM           | 2.6 $\pm$ 0.32   | 0.21 $\pm$ 0.023 | 0.36 $\pm$ 0.091 | 0.32 $\pm$ 0.1  | 0.36 $\pm$ 0.2   | 0.39 $\pm$ 0.32 |
| 0.35 mM          | 6.66 $\pm$ 1.2   | 4.42 $\pm$ 0.78  | 2.32 $\pm$ 0.93  | 2.53 $\pm$ 1.05 | 2.19 $\pm$ 0.63  | 2.23 $\pm$ 0.32 |
| 0.1 mM           | -4.05 $\pm$ 0.17 | 2.77 $\pm$ 0.168 | 2.75 $\pm$ 0.39  | 1.09 $\pm$ 0.65 | 0.20 $\pm$ 0.126 | 0.78 $\pm$ 0.46 |

**Table S5.** Average  $\pm$  Standard deviation of Py-OH functionalized sensors to pH range 3-9 (3 sensors each).

| Concentration /pH | 3                | 4               | 5                | 6                | 7                | 8                | 9               |
|-------------------|------------------|-----------------|------------------|------------------|------------------|------------------|-----------------|
| 1.6 mM            | -21.21 $\pm$ 2.3 | -15 $\pm$ 1.2   | -1.21 $\pm$ 0.2  | -11 $\pm$ 2.1    | -19 $\pm$ 5.2    | -41.3 $\pm$ 3.1  | -75.1 $\pm$ 4.4 |
| 0.8 mM            | -5.9 $\pm$ 1.2   | -5 $\pm$ 0.8    | -5.2 $\pm$ 0.61  | -6.11 $\pm$ 0.22 | 6.68 $\pm$ 0.9   | -13.3 $\pm$ 1.6  | -14.9 $\pm$ 1.3 |
| 0.4 mM            | -0.52 $\pm$ 1    | -0.53 $\pm$ 2.4 | -8.81 $\pm$ 0.25 | -4.34 $\pm$ 0.11 | -3.15 $\pm$ 0.08 | -8.02 $\pm$ 0.42 | -9.21 $\pm$ 1.8 |

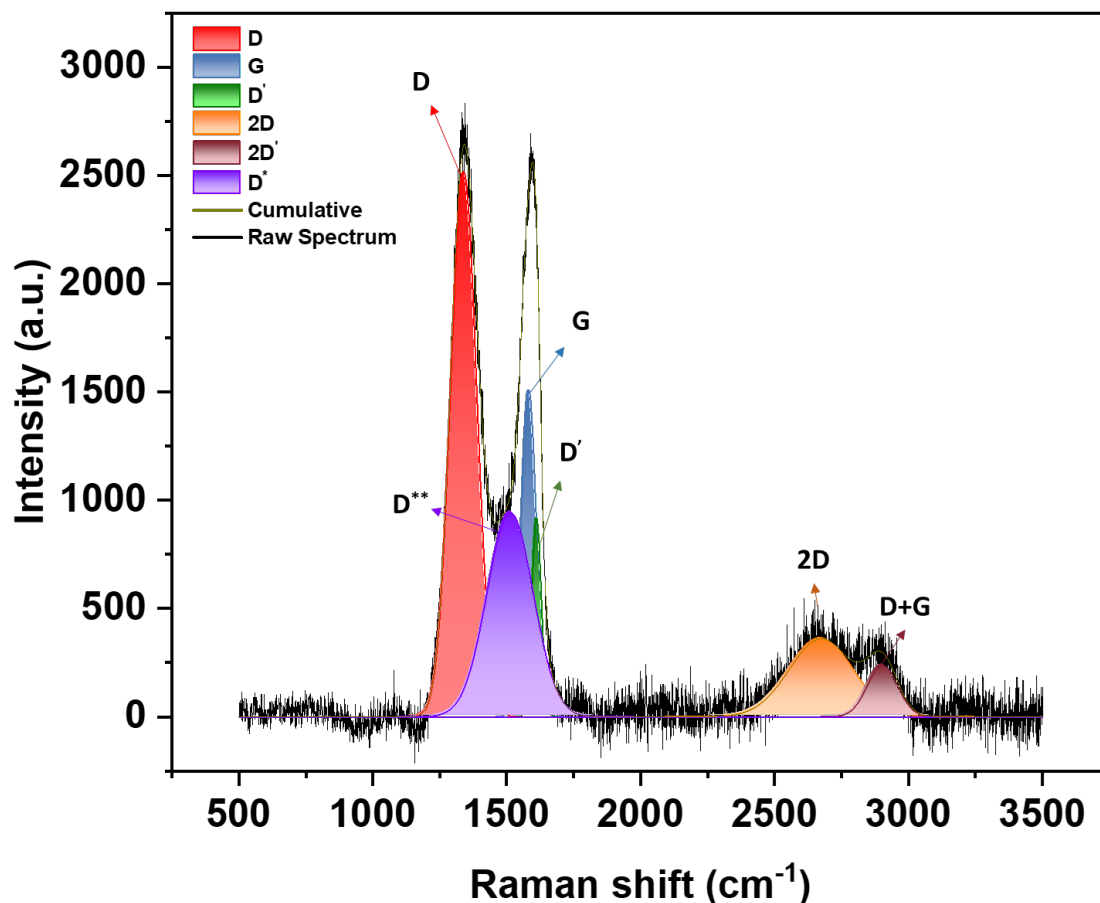

**Figure S6.** The Lorentzian deconvolution of GO Raman spectrum

## References

1. Zhen, X. v.; Swanson, E.G.; Nelson, J.T.; Zhang, Y.; Su, Q.; Koester, S.J.; Bühlmann, P. Noncovalent Monolayer Modification of Graphene Using Pyrene and Cyclodextrin Receptors for Chemical Sensing. *ACS Applied Nano Materials* **2018**, *1*, 2718–2726, doi:10.1021/acsanm.8b00420.
2. An, X.; Simmons, T.; Shah, R.; Wolfe, C.; Lewis, K.M.; Washington, M.; Nayak, S.K.; Talapatra, S.; Kar, S. Stable Aqueous Dispersions of Noncovalently Functionalized Graphene from Graphite and Their Multifunctional High-Performance Applications. *Nano Letters* **2010**, *10*, 4295–4301, doi:10.1021/nl903557p.
3. Georgakilas, V.; Otyepka, M.; Bourlinos, A.B.; Chandra, V.; Kim, N.; Kemp, K.C.; Hobza, P.; Zboril, R.; Kim, K.S. Functionalization of Graphene: Covalent and Non-Covalent Approaches, Derivatives and Applications. *Chemical Reviews* **2012**, *112*, 6156–6214, doi:10.1021/cr3000412.
